# Supplementary material
Source: Research Square preprint supplement (doi:10.21203/rs.3.rs-9042547/v1)
Supplement: Supplementary file 1 [file 3cc1306de18d590a0e000afe.docx]

## S1: Qualitative Instruments

**Focus Group Interviews with Program Staff**

**Project: *Accelerating Agroforestry Adoption for Planetary Health in Haiti***

*[Cornell IRB# 0146791]*

Upon obtaining written consent, the following are a list of questions that will be explored in a series of focus group meetings with program staff. Each focus group will run for 1 hour and will explore different topics. The questions below are the guiding questions of the focus group and it is expected that more than one question may be answered by a response or that other questions may arise as we work through them.

**Focus Group Session 1: Program Inception and Contextual Factors**

Date: ________________

List of participants:

**Introductions (~10 minutes)**

Name, your role and years working with [PROGRAM]

*[Interviewer: Let the participant know what the interview will be about, its structure, and its applicability. Define what scaling and scaling goals mean and ensure that the participant understands this. Lastly, request that the participant informs you when something is not clear so that further clarification can be provided. When the participant is responding, be sure to ask about when the people, institutions, or events discussed occurred along the program’s timeline or time stamps of the events in order to track changes.*

*I will like to leave the final ten minutes of this interview for final thoughts or words.*

**Program Inception: (15 minutes)**

Scaling is this idea that something can be expanded to more people, more geographical and institutional spaces. For example, today, a small healthcare organization begins piloting a model for community health in Cange. From the beginning the managers say, “in five years (2027) we would like to work with 20 communities in the area. In 10 years (2033), we would like to expand into another 20 communities.” At the same time, scaling can also mean creating a shift in culture and belief amongst a population to support an intervention. *I want you all to think about what was important along the way, that allowed the program to reach more people and more communities. I want you to also consider how reaching more people was hindered by the lack of certain resources or people in the program*.

1. Describe to me the scaling goals that the program initially had. If no goals were defined, what were the expectations relative to scaling?

Can you describe any of the scaling goals that the program initially had? If none were initially defined, what were the expectations relative to scaling?

1. Let us take a moment to recall when the program first began.
   1. What allowed the program to get started in the first place and in the particular service area? Why was this area selected?
   2. How did this program get started? Describe the people, the places, the funding, or support that got it going. Also, if you can, tell us about why this area was chosen?
   3. What helped the program determine its relevance to the needs of the potential participants?
   4. What were the most critical aspects of the program that you all would say allowed it to succeed in the first couple of years?

And once the program began, what do you think were the most important things that helped it succeed in the first couple of years.

1. Describe the initial recruiting strategies for communities? Were there any specific people or institutions that helped with community reach in the first couple of years?

What was it like getting the initial communities involved in the first couple of years? Who were the people or institutions that helped with community reach?

**Contextual Factors**

1. Can you recall if anyone involved in the program had connections to people in the Haitian government (local/regional/national)? If the program did have this connection, how accessible were these people and did they help the program’s activities in any way?
2. Does the program engage with any external stakeholders (people not directly involved with the program)?
   1. Can you recall any moment where their involvement or feedback was instrumental in the success of the program?
3. Can you recall any collaborations or partnerships, either domestic or international, and how they specifically helped you reach more people?
   1. Were there any financial benefits that came with collaborations/partnerships?
4. Does the program have an educational curriculum? If so, can you describe how it might have helped the program succeed and attract new participants.

*Finally, I want to turn our attention now to the available resources that the program has and how the program’s activities are planned and maintained:*

1. Can you give me an estimate on the yearly cost to operate the program and the type of funding sources that the program has had to support this?
   1. Was there a specific type of funding source that had the most influence on the program’s success?
   2. Can you recall any moments when lack of funding delayed or hindered the program’s ability to continue operating?
2. We now turn to a discussion on performance management (i.e., monitoring and evaluation): **(5 minutes)**
   1. Describe the role that monitoring and evaluation played in the program’s ability to reach more participants and/or communities?
3. About how many people make up your staff? **(10 minutes)**
   1. Were there any characteristics of staff on that you think helped the program achieve its scaling objectives?

*This is the end of the first focus group. Do any of you have any final thoughts on the questions we discussed today?*

**Focus Group Session 2: Socio-political Disruptions and Strategies**

Date: ________________

List of participants:

*The focus group will now focus on the socio-political disruptions and how the program strategized through them in order to ensure that activities were maintained in order to continue to meet scaling goals.*

1. Can you recall the socio-political disruptions that occurred since the program was established? HERE IS A LIST OF DISRUPTIONS THAT HAVE OCCURRED IN HAITI WITHIN THE PAST TWO DECADES.

- <https://docs.google.com/document/d/1K4d5ufF90rnF_LMakCtN3szLPtPDvshWV5PFgZVzh0U/edit?usp=sharing>

Can you describe any challenges the program faced during any of these moments?

1. Taking some time to remember the connections to people in government that the program might have had, can you recall if they played any role in the program’s ability to better manage itself during disruptions?
2. Was expanding the program put on hold during these moments? Why or why not?
3. Can you recall if the criteria for site selection of new communities (e.g., physical location, presence of other organizations, level of social capital, distance from urban centers) was adapted to ensure that socio-political disruptions or conflicts did not cause early termination of the program in the new site?
4. How did the program equip program participants and their communities to ensure that they could maintain their activities on their own when moments of conflict and political disruption did not allow field staff to visit?
5. What sources of funding were the most secure during moments of disruption?
6. Apart from the program’s staff, were there any external people (e.g., members of the communities, farmer groups) that helped support program activities during disruptions?

*This is the end of the second focus group. Do any of you have any final thoughts on the questions we discussed today?*

**Individual Semi-structured Interviews with Agroforestry Program Field and Management Staff (Broad)**

**Project: *Accelerating Agroforestry Adoption for Planetary Health in Haiti***

*[Cornell IRB# 0146791]*

Upon obtaining written consent, the following are a list of questions that will be explored in an interview format. The interview should take no more than 45-50 minutes and will focus on topics related to the program and the ways in which it was able to reach communities throughout the period of 1981-2023.

Participant’s Name:_______________________________________

Interview Date and Location: ______________________________

Program/Organization Name(s):

*[Interviewer: Let the participant know what the interview will be about, its structure, and its applicability. Define what scaling and scaling goals mean and ensure that the participant understands this. Lastly, request that the participant informs you when something is not clear so that further clarification can be provided. When the participant is responding, be sure to ask about when the people, institutions, or events discussed occurred along the program’s timeline in order to track changes.*

SCALING IS: reaching more people, reaching more areas, getting access to institutions, changing the culture and belief in order to support the scaling process.

**Part I: Background Information**

1. Briefly tell me about yourself (age, where you are from, your field).
2. Please let me know how long you have worked in Haiti.
3. What was the motivation for working with the program(s) you listed above?
4. Were you trained prior to and/or provided training during the program’s implementation?

SKIP THE QUESTIONS THAT DO NOT APPLY

**Part II: Program Inception – Let’s talk about when the program began**

**Skip if you were not present at the beginning of the program.**

1. Did this program get started during a moment of conflict (protests, embargos, coup-de-tats, increased gang violence, hurricane or earthquake)? If so, what was it like getting it started.
2. Did the program(s) have any goals related to reaching a certain number of people or communities or regions? Can you describe them to me?
   1. Were there certain institutions (local to international) that they wanted to work with?
   2. Were there any intangible goals (e.g., changing people’s hearts and minds; shifting the culture)?
3. Can you describe what it was like to get communities involved in the first [couple of] year[s] of the program(s)? If you were not there during the first year, do you remember what recruiting was like during your time with the program?
   1. What things made it easy for the program to do this? Anything specific about the program that helped?
   2. What things made it difficult for made it difficult to do this? Anything specific about the program that didn’t help?
   3. Was there any help from people outside of the program?
4. Once the program(s) officially got communities involved, can you tell me about the strategies the program(s) used to get even more communities involved? What worked well and why?
   1. Did these strategies change when moments of disruption occurred?

**Part III: Contextual Factors- Moving beyond just the first couple of years, let’s include the years after up until present day.**

1. How involved was the program with the Haitian government? Did any government activities help or restrict the program with its goals?
   1. Do you recall any government involvement during moments of disruption?
2. Were there any people or institutions that played a role in getting more people and communities involved??
   1. Any people that made moments of disruption easier for the program to handle?
3. Can you describe any partnerships or collaborations that helped the program(s) reach more people and communities and overall goals?
   1. How important was it to have a trusting relationship with the partners and collaborators?
   2. Did these partnerships or collaborations help during moments of disruption? If so, how?
4. As someone that saw some (or all) of the everyday operations in the field, can you describe the ways that the program(s) tried to adapt to the local context and needs of participants?
   1. Do you think this helped reach more people and communities?
   2. Did any adaptations have to be made during moments of disruption?
5. Did the program(s) engage with stakeholders (e.g., the beneficiaries, the funders, the institutions)?
   1. If so, can you describe some of the ways that the program(s) engaged with them?
   2. Did the program actively try to work on building a trusting relationship with any of these stakeholder groups? If yes, why?
   3. Do you think engaging with them helped the program in any way? Especially, during moments of disruption?
6. Do you have any knowledge on the financial resources that the program(s) had, if so, can you describe how that helped the program(s) advance into communities and augment their activities?
   1. Can you describe any instances when funding was low, and how that affected the program(s) ability to reach its scaling goals?
   2. What was funding like during moments of disruption?
7. Did any program you worked with have an education curriculum?
   1. Can you describe the education curriculum?
   2. How important do you think having an educational curriculum was in order to get people and communities involvement and reach new participants?
8. Can you describe the management style your program(s) utilized? (for example- who was in charge, who had a say in things, who could provide feedback and criticism on the program’s activities)
   1. Do you think it was a flexible management style?
   2. Do you recall how this management style helped the program reach more people, communities, and their overall goals?
   3. What was the staff like? Were they locals, foreigners, their genders?
   4. How important was it to foster trusting and long-standing relationships among the team members in order to achieve program goals?
9. What was planning like for the program(s)? Does working in Haiti require a lot of planning in advance? Was planning successful in being able to carry out activities and reach communities?
   1. How was planning like during moments of disruption? Were there any specific strategies the program used to keep things going?
10. Do you recall the program(s) doing any monitoring and evaluation? Did the findings help the program(s) adapt and reach more people and communities in any way?
11. Last question, with all things considered, what do you think are the central elements of the program(s) that have helped it operate in Haiti and be able to reach people and communities? You can re-state/reinforce something that you said prior, but I would like to offer you an opportunity to provide me with your final thoughts on this.
